# Supplementary material
Source: publisher site journal article supplement (https://www.spandidos-publications.com/3854/downloadSupplementary)
Supplement: Supplementary file 1 [file downloadSupplementary]

## Sheet: SI Table 1
Table SII. Log2-transformed and normalized fluorescence intensity values for selected genes in the Örebro cohort. In total, 80 samples from breast cancer patients with (Yes, n=24) or without (No, n=56) distant recurrence were analyzed with microarray.
Recurrence	EPAS	LDHA	SLC2A1	CA9	NDUFA4L2	ESR1	ERBB2	CCND1	MYC	HIF1A	MKI67	VEGFA	SLC7A5	MTOR
Yes	1.04692	0.45141	0.5173	0.61134	0.55816	-0.99068	-0.54194	0.17577	0.54295	0.09834	0.04285	0.55194	0.09624	0.30871
Yes	-0.18007	-0.66897	1.43076	-0.52498	-0.17564	0.10766	0.26773	0.68768	0.18191	-0.39509	0.64427	0.30662	0.01607	0.63919
Yes	-0.48638	-0.85596	0.74491	-0.63925	0.03035	1.19513	0.11626	-0.94038	-1.44969	-1.02835	-1.30104	1.77684	-1.46883	-0.01266
Yes	-0.21278	-0.15554	-0.27344	-0.92446	-0.64985	-0.54575	-0.26376	-0.94567	0.23486	-0.16287	1.14432	0.0447	-0.285	0.1135
Yes	1.5332	-0.01308	-0.46753	-0.44455	1.58171	0.25525	-1.21671	-0.43465	0.048	0.04272	-1.82357	1.0446	-1.03908	-0.12682
Yes	0.21595	0.23257	-0.09806	0.08814	0.32858	-0.56697	0.09341	0.36138	-1.19526	0.36888	-1.67634	-0.47697	-0.5953	-0.09979
Yes	0.10363	0.25614	-0.09826	2.41107	0.2587	-0.51447	2.31826	-0.77317	-0.37312	0.16553	-1.28689	0.29568	-1.21764	0.44863
Yes	0.83336	-0.79501	-0.48691	-0.4599	0.79319	-0.61679	-0.25447	-0.77453	-1.13024	0.28463	-1.64322	1.09419	-1.27633	-0.11801
Yes	0.48049	-0.28695	0.02195	-1.93238	0.64645	-0.49439	-0.58546	-0.02072	-1.35429	-0.1494	-1.11441	0.39082	-1.52602	-0.25687
Yes	-0.16269	0.22245	-0.14624	0.59049	-0.70778	0.08363	0.30281	1.39175	0.02295	-0.64726	1.40237	-0.24356	-1.6654	-0.04175
Yes	0.52848	0.41865	-0.20161	-0.94978	-0.10044	0.75852	-0.37521	0.25725	0.99021	1.1561	0.65795	0.01136	-0.91377	0.0135
Yes	0.28977	-0.79631	0.39912	-0.88885	0.5124	0.12005	-0.01459	0.15027	-0.074	-0.59256	-1.05952	1.32942	-1.34714	-0.05699
Yes	-0.93929	-0.41529	0.02415	1.25185	-0.10779	1.10013	0.1198	0.64559	-0.41884	-0.83286	1.06203	0.91475	-0.40155	0.19677
Yes	0.0186	0.0036	0.27255	0.46386	-0.55011	0.90966	2.34657	-0.17258	-0.15016	0.88956	0.4178	-0.18297	-0.33227	0.09092
Yes	0.36567	-0.24551	-0.85364	-0.15255	-0.25428	0.36003	1.60344	-0.60817	-0.05678	-0.25629	0.5571	-0.2461	-0.65038	-0.24275
Yes	-0.62321	-0.05998	-0.77582	-1.00655	-0.18333	0.68272	1.24389	1.23039	-0.48078	-0.83252	1.81808	0.58906	2.41997	0.00921
Yes	-0.50518	0.28076	0.79958	1.49608	-0.83362	0.80089	-0.58106	0.45397	-0.96469	0.10207	0.5748	0.03484	1.11477	0.0897
Yes	-0.13793	0.78571	0.18999	2.39075	0.62423	-0.29833	-0.12886	-0.30541	-0.65147	0.40822	-1.39537	2.42649	-0.08863	0.49918
Yes	-0.88186	0.2502	-1.09546	-0.08156	-0.39637	0.69381	-1.83169	-0.50796	0.25881	-1.04375	1.39949	0.04362	-0.20988	-0.1568
Yes	1.14284	0.20323	-1.24122	-0.32707	0.83673	-0.33107	-1.52129	0.76996	0.21131	0.55704	1.68232	-0.21604	0.71073	-0.29379
Yes	-0.52226	1.04926	1.52221	1.98932	-0.53778	0.12777	0.5891	-1.04532	0.02269	1.62958	0.81261	0.79459	1.90082	-0.08351
Yes	-0.13558	-0.8219	-0.68836	1.84559	-0.58737	0.65936	1.89927	-1.20205	0.68498	0.22602	0.52322	1.36333	1.80143	-0.35394
Yes	1.17674	-0.09922	0.59562	0.84376	1.06761	-0.9628	1.02802	-0.43824	0.35006	0.53024	-0.57146	1.04592	2.06652	0.03178
Yes	0.00828	-0.20838	0.08434	0.3863	-0.19213	-0.51421	-0.77271	0.31254	-0.23225	0.26168	0.92139	0.0768	1.66147	0.1047
No	-0.23383	-0.99079	-0.81924	0.47306	-0.95009	0.01289	0.85971	0.46346	0.35741	-0.18558	-1.77052	-0.22819	-1.06307	0.17469
No	-0.31703	0.21571	-0.90821	-1.96662	-0.26095	0.28111	-1.13932	0.40403	0.03283	-0.98313	0.04224	-0.4242	1.2465	-0.49747
No	-0.66127	-0.85687	0.94035	-1.03871	-0.43178	1.49158	1.01804	-0.96	0.14099	-1.28234	-0.51706	-0.06427	0.88688	-0.2285
No	0.15009	0.48357	0.0173	1.24476	0.0516	-0.62172	-0.6868	-0.04502	-0.17655	-0.01686	0.17601	0.26231	0.91161	0.13723
No	-0.73214	-0.11285	-0.07301	0.89009	0.25801	1.07608	-0.34883	0.77365	0.9368	0.02571	0.1705	0.33013	-0.99136	-0.14748
No	0.64632	-0.01189	0.96645	-0.09814	0.54328	0.34742	-0.04763	0.60085	0.46819	-0.2394	-0.46051	-0.02017	-1.6345	-0.11208
No	-0.83176	-0.73547	1.49223	-1.18216	-0.35965	-0.45911	0.69042	0.11036	0.37747	-1.46902	-1.14995	0.21567	-2.54597	0.04179
No	-0.27228	-0.33756	-0.57933	0.27144	0.28885	-0.19637	-0.29133	0.66832	-0.35974	-0.07217	0.44377	0.17792	-1.47011	0.06436
No	-0.96198	-0.12189	0.34929	-0.6228	-0.4317	0.47712	0.38215	-0.34346	-0.04724	-1.18653	1.10787	0.21634	-0.11818	0.31233
No	0.21893	-0.07861	-0.83509	-0.7468	0.6184	-0.01457	-0.53976	-0.09155	1.26639	-0.92972	1.33314	-0.14387	0.9975	-0.2074
No	-0.51048	-0.97666	1.16288	-0.78295	0.13818	0.79098	0.01301	0.72744	-1.4398	-0.84982	-0.13947	-0.96899	-1.42686	0.10146
No	-0.07287	-0.64707	1.51213	-0.19279	-0.64786	0.28827	0.88139	0.41683	-0.51856	0.29765	1.21217	0.11597	-0.48334	0.32457
No	-0.89459	0.28563	-0.88174	2.73792	-0.38177	0.66349	0.00926	-0.75987	-0.4364	-0.79786	0.65745	1.3324	-0.44099	-0.28684
No	0.0251	-0.0718	-0.47955	0.76844	0.44685	-0.75266	-0.58031	0.10482	-1.21658	0.63429	-0.10619	0.49446	-0.47408	0.159
No	-0.28169	0.52589	0.46744	-0.00829	-0.68608	-0.96778	0.48698	-0.61485	0.75482	-0.14447	-1.59154	-0.93761	0.30057	-0.15824
No	-0.36509	-0.00496	0.26328	-0.24955	0.57472	0.52725	-1.07172	0.18398	1.40739	-1.18862	-1.5142	-0.11449	1.19599	0.03188
No	-1.43262	-0.9957	-0.32088	-0.15784	-1.35019	1.43241	0.18134	-0.34743	-1.52447	-0.34346	-2.10027	0.84362	-2.27497	0.32042
No	1.51352	0.27246	-0.4688	-0.50486	1.06708	-0.29257	-0.6313	-0.69043	0.97855	-0.11059	-1.45676	1.70536	-1.27251	-0.11546
No	-0.34855	0.54351	0.47837	1.74557	-0.55548	0.41185	1.28504	0.30755	-0.82248	0.3515	-0.28704	0.39561	-1.2376	0.49945
No	0.43926	0.03009	0.36353	-0.30489	-0.28797	0.56603	0.94609	-0.36815	0.80158	0.72218	-0.48252	-0.63617	0.68486	-0.05407
No	0.42957	-0.32731	-0.45575	-1.01995	0.57156	0.61885	0.09392	0.32434	-0.16145	-1.32503	-1.72471	-0.31999	-2.13873	-0.10394
No	1.01409	-0.28265	-0.10869	-0.49819	-0.27506	0.79297	0.01252	0.35722	0.42596	-0.98362	-0.42405	-0.50552	-1.78559	-0.04642
No	0.02666	-0.01624	0.16884	-0.40849	0.26941	0.53984	-0.9116	-0.21149	-0.56956	-0.18557	-0.91863	-0.10181	0.87486	-0.34239
No	0.44215	-0.24704	-0.63623	-0.7381	-0.41066	-0.32305	-1.29419	-0.56837	-0.3968	0.04228	-0.51279	-0.02004	0.73454	-0.15606
No	0.09859	0.38923	-0.60085	-0.45327	0.4147	-0.11954	-1.39221	-0.1973	-0.30847	0.31678	0.54812	0.53563	1.02436	0.31919
No	-0.61874	0.42867	0.171	1.52694	-0.9717	0.77575	0.08831	-0.24255	-0.52657	-0.17271	-0.45253	-0.31091	-2.06228	0.54085
No	0.26764	-0.60449	-0.17723	-1.01077	0.00516	-1.1757	2.13136	-0.5646	-0.80856	0.33242	0.26958	-0.63881	0.3163	-0.30423
No	-0.65183	0.49346	-0.69255	-0.17146	-0.80058	1.05803	0.40166	1.23051	2.53104	-0.55615	0.40027	-0.13984	-0.73254	-0.20409
No	-0.8492	-0.6742	1.73789	0.74474	0.04138	1.48467	-0.32265	0.6926	-0.5823	-0.28491	1.7688	-0.7779	-0.5854	0.37473
No	0.01257	-0.44726	-0.6128	-0.39028	0.16614	-0.29912	0.17556	-0.33874	-0.68449	-0.20416	-0.6479	-0.79075	-0.08383	-0.14098
No	1.32278	0.14273	-1.19591	-0.7091	0.81572	-0.73352	-0.67709	-0.69899	0.55232	0.55527	-1.55457	-0.06532	-1.45165	-0.09086
No	0.29345	0.37935	0.15321	-0.26844	-0.17758	-1.07404	0.30716	0.4681	0.58182	-0.68284	0.75066	0.95859	-0.69426	0.20075
No	-0.01875	0.16756	-0.12806	-0.3242	-0.09161	-0.08749	0.02258	0.63991	0.02364	-0.78537	-0.97858	0.07321	-1.2767	-0.01112
No	-0.04666	-0.07713	-1.02761	0.5481	-0.12888	0.30457	-0.88893	0.36103	0.44433	0.0896	0.48147	-0.30071	0.08395	-0.41498
No	0.36735	0.43572	-0.09868	-1.5811	-0.44112	-0.52241	1.94804	0.13425	0.80717	0.08285	-1.16913	0.89787	-1.04393	0.25931
No	-0.42566	0.28551	0.21291	-0.42547	-1.13463	0.02699	-0.59156	0.76715	1.5192	-1.03054	1.09943	-0.38902	1.00202	0.24145
No	0.12029	0.05422	-0.74868	0.02299	0.178	-0.51379	-1.12533	0.54343	1.50014	-0.67744	0.13632	-0.58416	-0.42495	-0.2865
No	0.00973	-0.31987	0.6021	-0.12181	-0.69034	0.0377	0.12393	0.00504	0.6734	-0.2368	0.86854	-0.65845	0.86362	0.32124
No	-0.11918	0.72244	0.29534	1.0582	-0.49822	-1.07717	3.10097	-1.13875	-0.30059	0.25572	0.68643	2.36322	1.84422	0.16767
No	0.59507	-0.477	0.6047	-0.73761	0.19174	-0.01671	1.73283	-0.43668	-0.70476	0.30492	-0.41488	-0.82541	-0.37044	0.00789
No	0.65692	0.59907	0.55801	0.27344	-0.88363	0.1918	-1.27776	-1.26408	0.03576	1.0657	1.09824	-0.5585	1.36373	-0.04102
No	0.0392	0.54791	-0.42042	0.43379	-0.08943	-0.75301	2.71949	0.03201	-0.25596	-0.19024	0.24874	0.4047	1.00667	-0.01249
No	0.15791	-0.68458	0.49066	-0.16049	0.51249	0.67879	-0.16557	0.86781	1.15871	-1.28579	-0.41271	0.53133	0.80488	0.23949
No	-0.16885	-0.76699	-0.73904	-0.60051	0.0443	0.04799	0.58251	-0.07616	-1.22604	-0.98485	-1.18997	-0.577	-0.15059	-0.12966
No	0.3318	0.08745	0.89543	0.93972	0.52104	1.04852	-0.93391	0.59845	0.48173	0.91882	-1.16761	0.15013	1.28806	0.07787
No	-0.5255	0.05183	0.36307	2.51688	1.07	0.30549	-0.41568	-1.7148	-1.89736	-0.42216	0.5567	1.73926	0.71802	-0.25988
No	0.57978	-0.73056	-0.45372	-0.54044	-0.76095	0.67475	0.17477	-0.65532	-1.37104	0.53675	-2.03779	-0.00561	0.63926	-0.04705
No	1.2131	-0.09667	0.09746	-0.32797	0.84446	0.39291	0.93151	0.02559	1.36975	-1.07317	0.01288	0.71507	1.58393	0.4944
No	-0.82566	0.08867	1.42138	0.52851	0.41679	0.89085	-1.29123	0.85035	0.45659	0.85231	1.77588	-0.97246	1.98013	-0.39788
No	0.1721	0.41679	-0.17809	0.86606	0.79132	1.33515	0.45428	0.56632	-0.40671	1.54037	-0.79217	1.19274	2.57841	0.23861
No	0.41875	0.85118	0.67091	3.52885	0.99652	-1.23661	2.57824	0.07443	-0.23763	0.80916	0.24599	1.90293	1.50949	-0.00335
No	-0.806	0.83687	-0.18329	3.3304	-0.71081	0.24861	-0.47241	0.11374	-0.19163	0.05717	1.57145	1.18458	1.78633	0.48102
No	0.97275	-0.09428	-0.40246	-0.28693	0.56433	-1.00248	-0.72484	-0.22768	1.6829	1.0711	0.93415	-0.33603	1.79462	-0.36336
No	-1.07885	0.04512	1.1344	-1.15842	-0.65074	0.89761	-0.23971	-0.2626	-0.88575	-1.6571	2.01936	-0.47151	2.4689	0.50254
No	-0.46101	-0.12072	-0.08534	-0.56797	-0.11351	-0.6327	1.17181	-0.25869	-0.20792	0.01636	0.19156	-0.5148	1.19442	0.26104
No	-0.17265	0.75014	-0.44964	1.32846	0.1074	1.42485	0.27781	-0.25932	1.44489	0.52023	0.03665	1.88169	1.90574	-0.38095
